# Supplementary material
Source: Research Square preprint supplement (doi:10.21203/rs.3.rs-9140958/v1)
Supplement: Supplementary file 1 [file 9ffd22e16b5ad04e2dac2558.docx]

| **Additional File 2.** Friction points of overdose response with illustrative quotations | |
| --- | --- |
| 1. Social: (In)action of others |  |
| Disengaged or uncooperative | I'm like, call 911. And they’re like, no, we’re not calling anyone. What if they come and they find drugs on him? I'm like, what if he dies? You know, they, they wouldn't allow it. They would not allow me or let anyone else call 911. But by the grace of God, the Narcan saved him. And brought him back enough to where he was snapping out of it. (02.26SAB) |
| Helper interference | Everyone's surrounding him, fucking [Molly]’s like freaking out, trying to, like, get him back, and that's the time I was talking about, when she fucking went to do CPR and she didn't plug his nose and I had to, like, throw her off. I'm like, and she was fighting me off. She's like, no, get the fuck-- She knows that I can handle it, but, and it was fine. (11.07PAB) |
| Panicked bystanders | I wish I had somebody else but when I started saving him I had two of my friends and they were over in the corner like this [squeals]. I was like, you guys, get the fuck out of my house. Just go. I look over there and they're like, they're like blue. They're not breathing. I was like, get the fuck out of here, guys. That shit doesn't help. You really have to assess the situation. It just sucks. People just don't care anymore. They don't. They don't care. Once I told them, I said, you guys, get the fuck out. They're all, really, we could leave? Yes, get the fuck out. They were like, OK. (03.12SAB) |
| 2. Resources: Naloxone issues |  |
| Naloxone unavailable or inaccessible | I got Narcan in the glovebox. But his knees are up against the glovebox so his homegirl had to run to the back, know what I’m saying? Fuck man. (03.11SAA) |
| Device issues | That's annoying about the, about having the injection kind is like, the little bottles, sometimes they have a little bit in them, sometimes they have the full dose left in them, and you have like six little bottles and you're like, there's only a tiny bit in this one, there's a little bit in this one, I have to try to, yeah, yeah, it's like, yeah, it's like a chemistry experiment that I, you know, don’t want to be doing right now. (10.08GAA) |
| Time dilation | Now, you ask any group of people, you know, close your eyes, open them, fucking in 30 seconds. They'll all open their eyes, fucking, well before fucking 20 seconds. Time just, you know, it’s like the pressure’s on, bang, you know, they're not waiting three minutes before they give them another one, you know. It's, oh, fucking 30 seconds later, they're going, oh, fuck, how long's it been, oh, fucking another one, you know. Yeah, oh, yeah, I waited all that time. No, you didn't, because you gave them six, you didn't wait half an hour, you know, yeah, you know, it's... (0.28SAA) |
| 3. Responder readiness: Hesitation | |
| Physical comfort | I told him, you could lay here on the floor, man, for a couple of hours. I woke up, man, and looked at him, and he had blood coming out of his mouth real thick. ... When we woke up. So I tried to get him up. I wasn't going to do no CPR or nothing with that thick ass shit. (11.14PCA) |
| Psychological comfort | Back in the day, my ex-boyfriend, unfortunately he lost his life to this. ... And for a while there after that I couldn't do CPR on nobody because his face would just pop up. ... It was really traumatic and stressful for me. Like it would suck all the energy out of me. I'd have to go lay down, I think maybe just because I'd get depressed afterwards or something, I don't know, but I got past that finally. (10.14GAA) |
| 4. Knowledge: Incomplete information | |
| Drugs used | You can't tell if it's like, if it's xylazine or fentanyl or heroin. Heroin, you can tell. They just bounce right back. If it's just heroin and it's just heroin in their stuff, they bounce right back. If it's fentanyl, it's going to take a little more. Xylazine, you can't do nothing about it. But you can't tell. (10.17GCB) |
| Coming in mid-way | Well, I mean the one that I came to, they was already damn near, I didn't see the whole process until I seen them on the ground and…unresponsive. And that's how I knew. And then my kids will point, mom, what's wrong with them? What's wrong with them? They look like they need help. But every time that I’ve came to an OD, it's always been at the ass end of it. So like, I didn't see how they got to where they was. It was already them on the ground. (02.27SAB) |
| Background knowledge | I went and I started like trying to wake her up, like, you know how they do the compression rubs. The sternum rub. And that didn't work. So that's when I administered the first naloxone and I waited like a couple minutes. At that point I started trying to do CPR, which I have no knowledge of doing. And like I was looking at my phone to make sure that I was timing it correctly. (10.09GCA) |
| 5. Environment: Physical complications | |
| Spatial factors |  |
| Position | He was crumpled right there on the door and it was locked. So I grabbed the hanger, shoved it in there, unlocked it, but then I couldn't shove him. Because he was in between the sink. His head was by the toilet and his butt and legs were by the door, right behind the door. And I was like, get up, get up. I can't get in there, Matt. You got to move. I sat on the floor and shoved with both feet. And I slid him at least a little bit. And I did, too. (11.03PCA) |
| Location | Then he's in the front seat with the steering wheel and everything, so we’re like, let’s put him in the back seat. So he has room to breathe. So we tried to drag him to the back, which was dead weight. (02.26SAB) |
| Physiological factors |  |
| Weight | Now, I didn't have any [naloxone] but one of those inhalants and I've got a almost 300 pound man on me. So imagine yourself doing this: Pom pom pom, phoo. Wait. Pom pom pom, phoo. [imitating CPR] After about two minutes of that, you're gonna almost exhaust yourself to where you pass out. ... If you don't have any Narcan or anything, I mean, you can save people. You can save anybody out of a drug overdose. I can almost save anybody. But I couldn't do it by myself. ... After two minutes of doing that, you're gonna find yourself in complete exhaustion. ... It was really hard. I've never lost anybody in my whole life. Except that one person. (03.12SAB) |
| Rigidity | When I was trying to administer mouth-to-mouth, his jaw was clenched shut and I couldn't get him to open his mouth. I couldn't get any air in his mouth at all because it was so tight and shut. I had to do it through his nose. ... I didn’t what to do at first, and then I was like, well, I remembered from the Girl Scouts, you know, with the babies, you know, through the nose, you know? (03.12SAA) |
| Bodily reactions | I was at my friend's house and she ODed and everybody was acting like they didn't know what to do. So, I went over and I Narcaned her and I went to give her CPR. And, um, when she, uh, tightened up and stiffened, she bit part of my lip off. So that sucked. It grew back though. (11.05PAB) |
| Situational complexity |  |
| Multiple concurrent overdoses | Well, this was a scary one. Yeah. Um... I was with two people and myself. This time I didn't have... I only had one Narcan on me. And they both ODed. And the one was just like a lot worse than the other one. Like she definitely needed Narcan. So I Narcaned her. (11.05PAB) |
