# Supplementary material
Source: Research Square preprint supplement (doi:10.21203/rs.3.rs-9140958/v1)
Supplement: Supplementary file 2 [file f579c183c9296404900be982.docx]

| **Additional File 1.** Inflection points of overdose response with illustrative quotations | | |
| --- | --- | --- |
| **Inflection point** | | **Illustrative quotation** |
| 1. Is this an overdose? | |  |
|  | Yes or no, based on... |  |
|  | Breathing | The breathing especially, is after your brain starts dying, your brain cells start dying after four minutes without oxygen. And one of the things you look for, it's one thing to be breathing, the reduction in breath. If somebody's breathing less than 10 breaths a minute, that's when it starts getting concerning. (10.10GAA)  Just like his lungs were froze or something. You could look at him and tell that he was dying. He wasn't quite dead, but he wasn't breathing. I stuck my finger under his nose. Nothing. (03.04SAA)  Sure enough, when we went back, he is now falling backwards, and he's gurgling, and it wasn't necessarily the death rattle, but it was like just a gurgle. (03.01SAB) |
|  | Color | I couldn't tell whether it was a nod, a deep nod, or it was an overdose until I saw the blue. And then I was like, nope. We're doing it. (11.03PCA)  I'm not going to let you turn purple if you're fucking already another color. You go from like…white to gray to like, you know, sort of like blue to fucking purple. (11.07PAB) |
|  | Pulse | I went through my normal process, checked their pulse and breath, and I won't administer naloxone unless their pulse and breath are gone. (11.05PCB)  You want to check for the lips, the eyes, and then check the pulse. A lot of times…We get like one or two beats a minute. (03.12SAB) |
|  | Consciousness | If they're like, if they're nodding out, usually they're either still sitting up, you know what I mean, or, you know, standing up, but it's when they're laying down on the ground, you know, that's, yeah, you know, kind of tells me something, something's wrong. (03.05SAA)  Most of the time, like, I'll walk up and see if they respond, and if they don't respond then that's when I know that they're ODing, and that they're unresponsive. (02.27SAB) |
|  | Info from others | Well even if I just walk into the situation, it’s usually one of the first things I ask. How long has he been like that? And how does he use? You know, and how did he? You know, how did he overdose? You know, smoking it, you know, find out right away. (03.04SAB)  I'll just ask, are you a heavy user? Like, how much do they use? How long have they been using? (10.15GAA) |
| 2. Do I respond? | |  |
|  | Yes, no matter the circumstances. | I would save my enemy. I'm not gonna give them the satisfaction of dying high. [Laughs] No, I'm just kidding. But no, I wouldn’t just, “Oh, no, I can't.” No, I'm gonna do that. (02.26SAA)  There's some people that I know right now, they're like, if I OD, don’t bring me back, and it's like, I'm sorry, I'm telling you right now, if you're around me, I don't care what you say, I am not letting you die around me, so if that's the case, you can just be mad at me when you come back, because I'm not letting you die. Yeah. I'm sorry, that’s not gonna happen, don't use around me then. Go somewhere else. (10.17GAA) |
| 3. What do I do first? | |  |
|  | Rouse first to confirm they're overdosing | See how much they are with you. Slap them around. It doesn't matter if it hurts them. They're fucking dying. Slap them around. Try and get some, because really you don't wanna put even the Narcan in them. You wanna bring them back without. And sometimes that's possible. Sometimes all you need is a little bit of a, wake up, dude. You know what I mean? And it could bring them back. It just depends on how far along they are. (03.12SAB) |
|  | Sternum rub | I started like trying to wake her up, like, you know how they do the compression rubs. The sternum rub. And that didn't work. So that's when I administered the first naloxone (10.09GCA) |
|  | Slap/hit | I went over there, I just, like, smack. Because I like to smack them to make sure they're not awake. And then, um…Narcaned him. And he’s like, whoaaa. I think they get adrenaline off that. When it wakes them up. (03.08SAB) |
|  | Shock | I didn't feel she needed [naloxone]. You know, I didn't feel, she was in and out of responsiveness, you know? I just figured her, which I got her back with the shower. You know? ... Because, I know what it's like to Narcan someone, man. It makes you hurt for a minute. ... And, I just felt like I had it if I needed it. But, I got her to the shower and the cold water lit her up. (11.03PCB)  I threw a soda on him and shit, you know what I'm saying? Nothing, nothing, man, right? I said, maybe I'll get some more Narcan out of my car, right? And nothing. (03.11SAA) |
|  | Verbal commands | I've tried like threatening, being like, "I'm gonna Narcan you!" ... I've been like [poof], like spritz some with like hairspray. Like, "Here it comes!" Like trying to like spook them out of it. ... Which, good thing I didn't Narcan them, because obviously they didn't need it. But it was just like a heavy nod, where like they weren't responding. (11.06PAB)  [I say] “Hey, the police are here!” And if they're not responding, then bang, you know, I'm gonna give [naloxone] to them. (02.28) |
|  | Skip to naloxone | Like you're just kind of just getting them wet and stuff and it's like, that doesn't really work. That's why you got to get Narcan and give them like that and do CPR like. Because like people like do some like dumb like, do some dumb stuff when they're freaked out. (03.06SAB) |
| 4. Do I involve others? | |  |
|  | Yes, if others around | Yeah, it's usually a team effort, like one person will like, you know what I mean, like kind of like run the show, but then everybody's kind of like helping, you know, yeah trying not to panic ... So someone will start maybe like, you know, rescue breathing or then the other person's going to grab the Narcan or, you know, coming back with it. And somebody grabbing water, you know. ... I think we all just kind of know what to do. So people are just like, you know, like, hey I’m going to do this. And I'm going to grab this. (10.18GAA) |
|  | If I'm not comfortable with actions | I've only had to save four women ... It's harder, because, you know what I'm saying? Because they're already frail. You know what I'm saying? And, fuck, for most of them, man, please don't, I don't want to break nothing, please. You know what I'm saying? Two of the four, I fucking turned it over to somebody else. You know what I'm saying? Because I don't want to break them. (03.11SAA)  He passed out with, like, liquid coming out from, his mouth and nose a little bit. … It's, like, a lot more intimate touching somebody at that point. Which, if it's life or death, I'm going to touch you. But I'd prefer to not have to. Luckily, his girlfriend was there. So as far as CPR, she did it. I did have to explain to her what to do. (11.05PAC) |
|  | If I need more supplies or materials | And then I had to call two of my coworkers. I'm like, hey, you got Narcan? She's like, yes, I have three of them in my car. I said, well, can you bring it over? I said, because it's like a 911 emergency. ... And she's like, be right there. And before I even had the phone hung up, she was already walking in my door. (02.27SAB) |
|  | No, no one has a level head | It's like chaotic a little bit because everybody's freaking out and I'm just trying to calm everybody down. And then I end up having to make everybody leave. So it's just too much, and I'm not into the bigger crowds and stuff anymore. ... Yep, I try to remain calm in all situations because you're not going to be able to think clearly and you're not going to be able to do what you need to do in order to get things taken care of. It could be a matter of seconds. Somebody's freaking out and I'm trying to calm them down. That could stop me from getting the Narcan and that could stop my husband from saving somebody or me or whoever is doing it. (10.17GAB) |
| 5. Should I give naloxone? | |  |
|  | Yes, better safe than sorry, or the signs are obvious. | I guess I'm kind of a dick this way or a jerk this way, like if it seems like you're probably gonna be going out and whatnot, I will hit you with Narcan because, like, better safe than sorry. And yeah hit him, hit him with one of the nasal applications and then got prepared to do CPR and whatnot. (10.15GCA) |
|  | Depends on depth of overdose | Because you don't want to accidentally Narcan somebody that's not on drugs or, you know what I'm saying? Or you don't want to Narcan nobody that's in no deep nod. Because, don't, like, or say if I'm in a deep nod, right? You Narcan me and I know, and I'm in a deep nod, I'm going to be so mad and I'm starting to go through them withdrawals. (11.10PAD) |
| 6. What kind should I give? | |  |
|  | Intramuscular is always better (stronger, more effective, faster acting, titratable) | Injectable’s like damn near like an instant thing. To whereas, when you do the nasal, sometimes, I’ve seen people try to use four different nasals, trying to get them up because it takes so long for it to react. Like I won't use nasal Narcan ... And the injectable’s like instant. So I've always advocated for the injectable. Because then you're not putting so much Narcan in them thinking it's not working, but it's just taking longer. (02.26SAA)  I normally would get the injection kind, because I knew how to use it. … And if you use the injection kind, you know, a lot of times people won't get sick, because if you don't give them a whole injection, it's not like a whole nasal spray. (11.07PAA) |
|  | Intranasal is always better (easier, faster to administer, more effective, widely available, needle fears) | I think that it's just way quicker and it's, it's easier to use and then there's like two in the box. (10.08GCB)  That's why I really like the nasal a lot better. As crazy as it sounds, because I told you I shoot up, like, I'm terrified of needles. I hate it. So, you know, sticking somebody with the needles, I just don't like. (11.06PAC) |
|  | Whatever's closest | Just goes down to personal preference for me. It's a toss-up. I don't care. It’s what I got at this point...I'd probably reach for whatever's closest. (11.05PAC) |
|  | Depends on depth of overdose | I try the nasal first. I usually don't like to have to inject it if I don't have to just because of the fact that most of the time, I don't like to inject somebody else with a needle, and they may not like me having to do that to them either. Usually it’s the last alternative is what I try to go with, you know, if the Narcan nasal isn't working. (03.12SAA) |
|  | Depends on tolerance | Basically based on is this guy addicted to opiates? What's available right now? Because their life's more important than all of that. Right? So that's basically what it's based on. If I have intramuscular and they're on opiates and I know they're going to go into precip, I'll use intramuscular. (10.15GAA) |
|  | Depends on physical attributes (sex, weight) | So if it's somebody that's of a lower weight, I will probably try to give them the injection over the nasal. Because I do not want to overdose somebody on that. (11.03PCA) |
| 7. How much should I give? | |  |
|  | Full dose every time | I'm not going to sit there and try to give you a half of a fucking dose and sit there and wonder if it's going to work while you're laying there dying. I'm going to hit you with the fucking one that goes in your nose and call it a day. I know it works. You know what I mean? (11.03PAA) |
|  | Depends on weight | The rule of thumb is to kind of go by their body weight, and approximate. It would be like the max, but I would kind of gauge it. Like with opiates, you can always add, you can’t subtract. With the intramuscular, I would kind of start, I found like about [a quarter vial], around there. And make sure you rub it in where you do it. And wait a little bit. And I'll give like a little bit more, a little bit more. (10.10GAA) |
|  | Depends on depth of overdose | Just depending on like how, how fast, like how, how fast they fucking went out or how fast their lips. Like if I know, like, cause some people, like, a little bit, you can tell, like, they turn whiter or bluer like quicker. It looks like they're fucking, they're going out quicker or some shit, you know, then I’ll just use the whole two. Like that. But if it’s like, if it’s somebody that's just out a little bit, like I'll give them, give them a half. (11.10PAB) |
|  | Depends on tolerance | I'm not going to squirt three or four milligrams of it in somebody's nose. Especially if they have a habit, they're going to be a little too fucking shocked. I can give them a half a milligram and wake them up. Not have them be sick. (11.05PCB) |
| 8. Should I give another dose? | |  |
|  | Yes, better safe than sorry, or the signs are obvious. | I know that it wasn't going to hurt her to have a second dose and the sooner she can come out of it and the, you know, the, yeah, just the faster that this is all over and that she's back to breathing and having her eyes open and being conscious the better, you know. And I just, I didn't, I didn't, I assumed but I didn't know for, I assumed that one dose would have been fine, probably would have done it, but I didn't know for sure, you know, like, if she did way too much dope or I didn't, I just didn't know, so, yeah. I thought, what's the harm in doing the second one, yeah. (10.08GAA) |
|  | Depends on signs of revival | Sometimes like I said, they could be breathing, but they're still not alert. They're still not quite conscious, and then, that's, I'm still gonna keep going until, like until I feel like they're fully alert and they're, like, they can talk to me. I want to make sure they can talk to me. (03.12SAA) |
|  | Depends on drug taken | Those are the rules for like heroin, you know, like fucking, it's definitely different for like fentanyl and it's definitely different for the xylazine. And whatever that new one is. Definitely a different thing. ... Like I've gone through all types and it's definitely, it takes more, you know. I guarantee there's not one person that like it's going to take just one or two Narcans, like the nasals, to bring them back with this shit, I guarantee you. (11.07PAB) |
| 9. How long should I wait for another dose? | |  |
|  | Same amount every time (package instructions, past experience) | I wouldn't jump to just giving them one until it's like five minutes has hit. You wanna give that drug some time, because sometimes like the larger the person, the longer it's gonna take to, you know what I mean? You gotta remember circulation, and they're dead. You know what I mean? There is no circulation. So you're putting it in a body that's like freshly cold. So you gotta remember, you gotta give it a second to do it because you can also overdose them on the Narcan. (03.12SAB)  I've noticed that in my recent cases where I've had to bring people back and they ODed, I would do a nasal and it would say on the box, wait three minutes and do it again. (03.01SAB) |
|  | Depends on depth of overdose | And we waited about maybe two minutes, three minutes. I know sometimes they say you want to wait a little bit longer, but at that time I felt like he didn't have that much more time. So I was like, fuck it, we'll just go for the second dose. (10.14GCA) |
| 10. Should I give CPR? | |  |
|  | Yes, every time | The rescue breathing in many situations is vital. Like, almost even helps more than the Narcan. But in a situation like that, and you're saving somebody's life, you just do it anyways. (10.10GAA) |
|  | No, don't know how or never had to | No. I kind of wish I knew how to do like CPR. Maybe that would have been an extra thing, if needed. (03.08SAA)  I don't know how to do that. I mean, I did take a CPR class because I was working at a daycare and I did nursing. But I honestly couldn't even tell you how to do it. (11.08PAA) |
|  | Depends on depth of overdose | I've Narcaned about 15, 16 people. Yeah, I've given CPR to eight, I don't know, nine people. [Interviewer: How do you decide if you're going to give them CPR or not?] When they do that sound. You know what I'm saying? It's like that's when their soul starts leaving, man. [Breathing out] They're done, man. ... They're dead when they do that. (03.11SAA) |
|  | Depends on naloxone effectiveness | But I had the nasal naloxone. And I just pulled it out. I turned her over on her side and [pssht]. And at first, she was, like, twitching, like, a little bit. And then she just [gasps]. But then she went, like, limp again. And then it was like [gasps, coughs]. And then I was like, fuck, rescue breathing. You know? And then I started to rescue breathe her. ... [Pfft.] Like, into her mouth. And then she [gasps]. (10.21GCA) |
|  | Depends on naloxone availability | I always had Narcan because I never wanted to be in that position. And I was in that position once without it. And I remember doing CPR to my girlfriend at the time. She'd wake up, cuss me out and drop back out. And we did this for like 20 something, 25, 30 minutes until she came back and that was without Narcan. (10.08GAB) |
| 11. Should I call 911? | |  |
|  | Yes, every time | Basically, you're supposed to call 911 every time you have to use Narcan. You know what I mean? Even if they come back, you know what I mean? You call them just to make sure, like, because there's things that you need to do that you may not know or remember or whatever, but I just call them every time. (02.27SAB) |
|  | No, not needed | I don't remember who was sitting by the door, but he came in and everybody's like, kind of like, ah, what do I do? What do I do? Like, really? Calm down. Stop yelling. Don't call 911. We don't need all that. Give me a second. You know, I had already done it like 20 plus times by then, so it wasn't too, you know, petrifying for me. (10.16GAA)  I just don't want anybody else involved, definitely don't want the cops there. I believe that they say you can just say someone's unconscious and they’re not supposed to send the cops, but you never know. And generally, if I can reverse it myself, don't need anything else, you know. (10.08GAA) |
|  | Depends on naloxone availability | Because I knew she was an overdose, and, like, I already gave her two, and I knew I was going to give, I'm like, I don't have any more Narcan, so that's why I called 911— (11.08PCA) |
|  | Depends on legal situation | No. I didn't want to call 911 just because it was just her and her son. She has warrants out for her arrest, and if she would have got taken away, the baby would have got taken away, and she already had her first son taken away, and they did a lot of drugs. (10.09GCA) |
|  | Depends on time elapsed | I mean, it's not 15 minutes, I'm calling it. Because I feel like they can go back, they can go back into that deep. But if I get them to start breathing and if I can maintain it, great. But sometimes it gets real sketchy. But as soon as they stop breathing, I'm usually right there where I'm going, okay, okay, okay, yeah, I'm not feeling it. (03.01SAB) |
|  | Depends on doses of naloxone used | If it comes to a point, like, after, like... I'm gonna say that we do, like, three, um, Narcans, and a bunch of shit, or, well, no, actually, I think we made it more of a higher number than that. Like, four, it was four of five, you know, like, if the fourth, after the fourth one. If they're not, um... And this is like from like a couple people. If they're not coming to, you know, or they are but they're in and out (03.05SAC) |
|  | Depends on depth of overdose | [Interviewer: Like, what's the point where you decide, like, I have to call 911?] Oh, maybe when they’re not responding, and I cannot feel their pulse, or, you know, they're not breathing. That's so scary to me. (10.18GAA) |
| 12. What do I do now? | |  |
|  | Stick around? |  |
|  | Yes, every time | I don't just go, welp, okay, you know. I do kind of like, even if I don't know them, because I remember when I came out of it, I was confused, cold, irritated, and no one was answering any of my questions, and no one was helping me. And by the time I realized, oh, [name], you stopped breathing, but you were Narcaned several times, you're okay. No, I'm not okay, and so I think that... It needs to come along with a little bit of TLC with that, because that's a scary feeling. You stop breathing, that means you were dying. Wow, that's powerful, that’s scary. (03.01SAB) |
|  | Depends on intention to use again | He actually did [use again] to reverse the withdrawal. ... But I made him wait two hours. So he was mad that I wouldn't do it. Because I even took the phone away from him, and the money. So he couldn't leave. Or go buy more. And then I had the dealer come to us. (11.03PCA) |
|  | Depends on their mental state | I mean, he was scared. He was crying. Like he didn't know what to do. So, I mean, he had some issues with his parents, so he really didn't have nowhere to go at the time, you know, so he was having, you know, family difficulties or whatever. So I let him stay in my room, you know, and just told me he could lay there just for as long as he needed or whatever, just to, you know, it's okay, you know, just chill, recover. [Interviewer: How long was that do you think?] A couple days. Yeah, he was pretty, like, just in shock. ... It really scared him. It was bad. Really bad. (03.12SAA)  One person just got mad and asked me why did I Narcan him, and I messed his high up and all this other stuff. I just walked away. (11.05PAA) |
|  | Depends on their physical state | I sat there with him for about a day and a half. And I felt like, cause I felt like I needed to. He was still going in and out, sleeping a lot. Um, sometimes he was disoriented. You know, he was talking about, uh, like his mom was still living. His mom's been gone for, I think like 25 years, they said. And, um, he was, he talked a little bit about the past, but when I finally left, um, he was, he was coming back to himself. You know, he knew who the president was. He knew who I was. He knew who the people in the house were. (10.21GAA) |
|  | Depends on their overdose experience | Sometimes the rest of the day, sometimes like two minutes, three minutes. Like yesterday, early today, yesterday, that homegirl hit something and she started going in the OD. Gave her the Narcan and then I left because the homegirl knew how to deal with it. (03.07SAA) |
|  | Depends on who else is present | [Interviewer: How long did you stick around after that?] I don't know, like two or three minutes tops. I just wanted to see if, you know, like. I kind of felt like they felt like I was invading almost, you know what I mean? Even though I just did this whatever, helped this guy out, I kind of felt like they didn't want me there no more after he had been alright, you know. And I gave [his friends] extra Narcan so. (10.07GAA) |
|  | Depends on law enforcement | I usually don't try to stick around. Especially, it depends on where you're at too. Like the city of [name] itself, the cops aren't bad. But when you go out to the little boroughs and, and all that, that's when, you know, they can be real dicks about things. ... you know the Good Samaritan Act? ... Well, like [city], you call the cops or call an ambulance and all that. They'll all hold to that. But if you go out to like the little boroughs and shit like that, they don't give a fuck. They're running their name. They're checking to see what they have on you. They don't give a fuck. (11.03PAA) |
|  | Tell them what happened? |  |
|  | Depends on their overdose experience | [Interviewer: Were you saying that it helps to not tell somebody you Narcaned them? ] Sometimes I've found. There's been a couple times that I hadn't. Especially if it's somebody who's been Narcanedd a lot, or more than once. When you do somebody, or somebody's Narcaned the first time, it can, it should be like an eye-waking experience. I need to be careful or I'm going to die. (10.10GAA) |
|  | Like, if I Narcan somebody. I try to, like, hide the evidence…quickly. Because I feel like, what I hate is when I see people, like, Narcan someone and then they wake up, and they're like, we just Narcaned you. Well, I'm kind of a more of a, like, a mind over matter person. Like. If I don't know, maybe I could convince myself that it didn't happen. Where, like. If I see all these, the Narcan thing next to me, I'm like, who was that for? And please don't fucking tell me it was for me. But now I'm freezing cold and have restless legs. So, I thought it was for me. ... Because I feel like they're immediately going to rack up another shot. And then go out again. (11.06PAB) |
